# Supplementary material for: Plant-Based Antidiabetic Nanoformulations: The Emerging Paradigm for Effective Therapy
Source: MDPI journal article supplement (doi:10.3390/ijms21062217), 2020-03-23
Supplement: s1 [file s1]

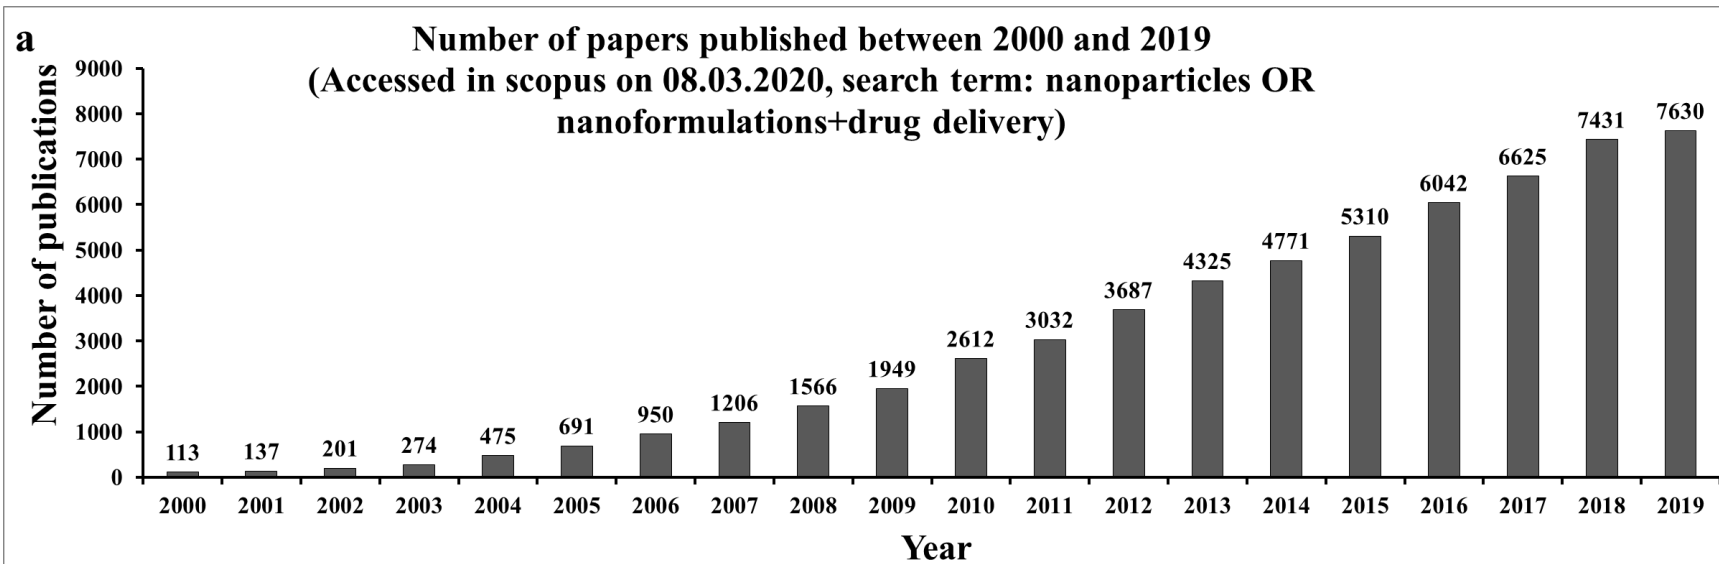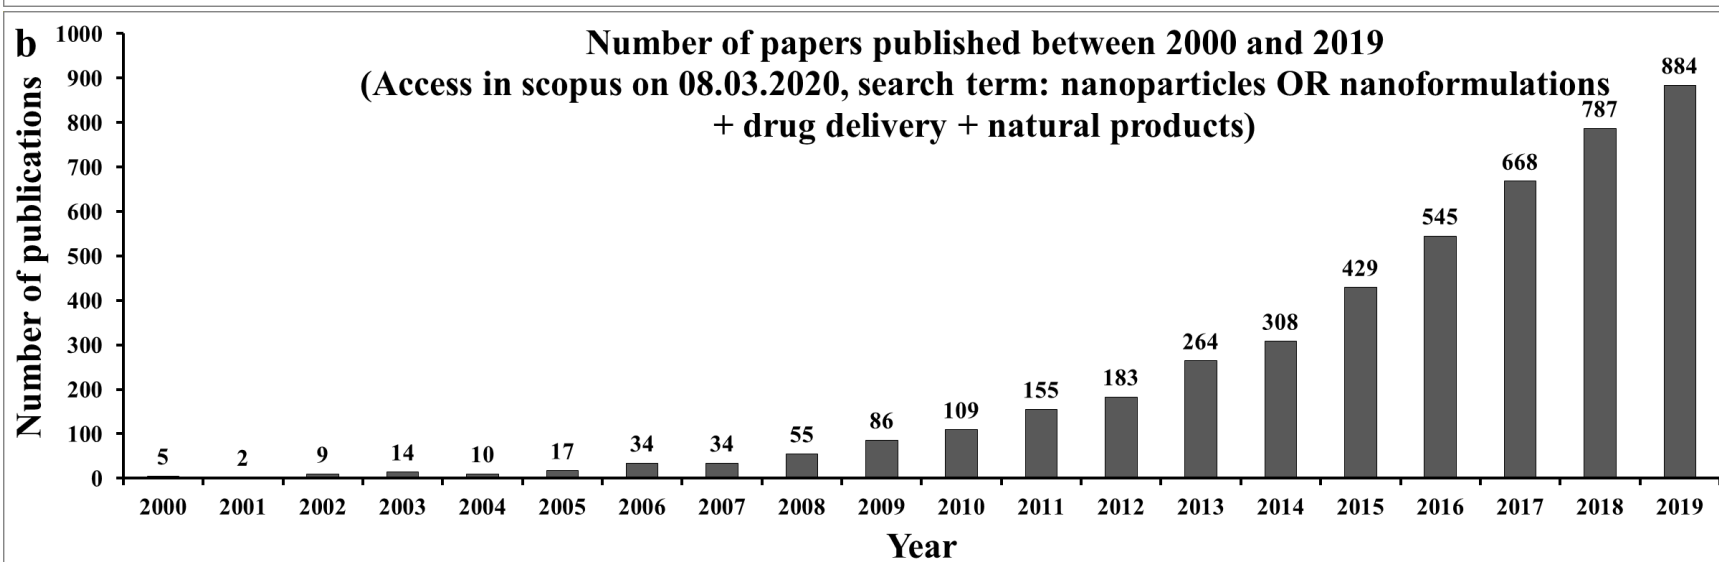

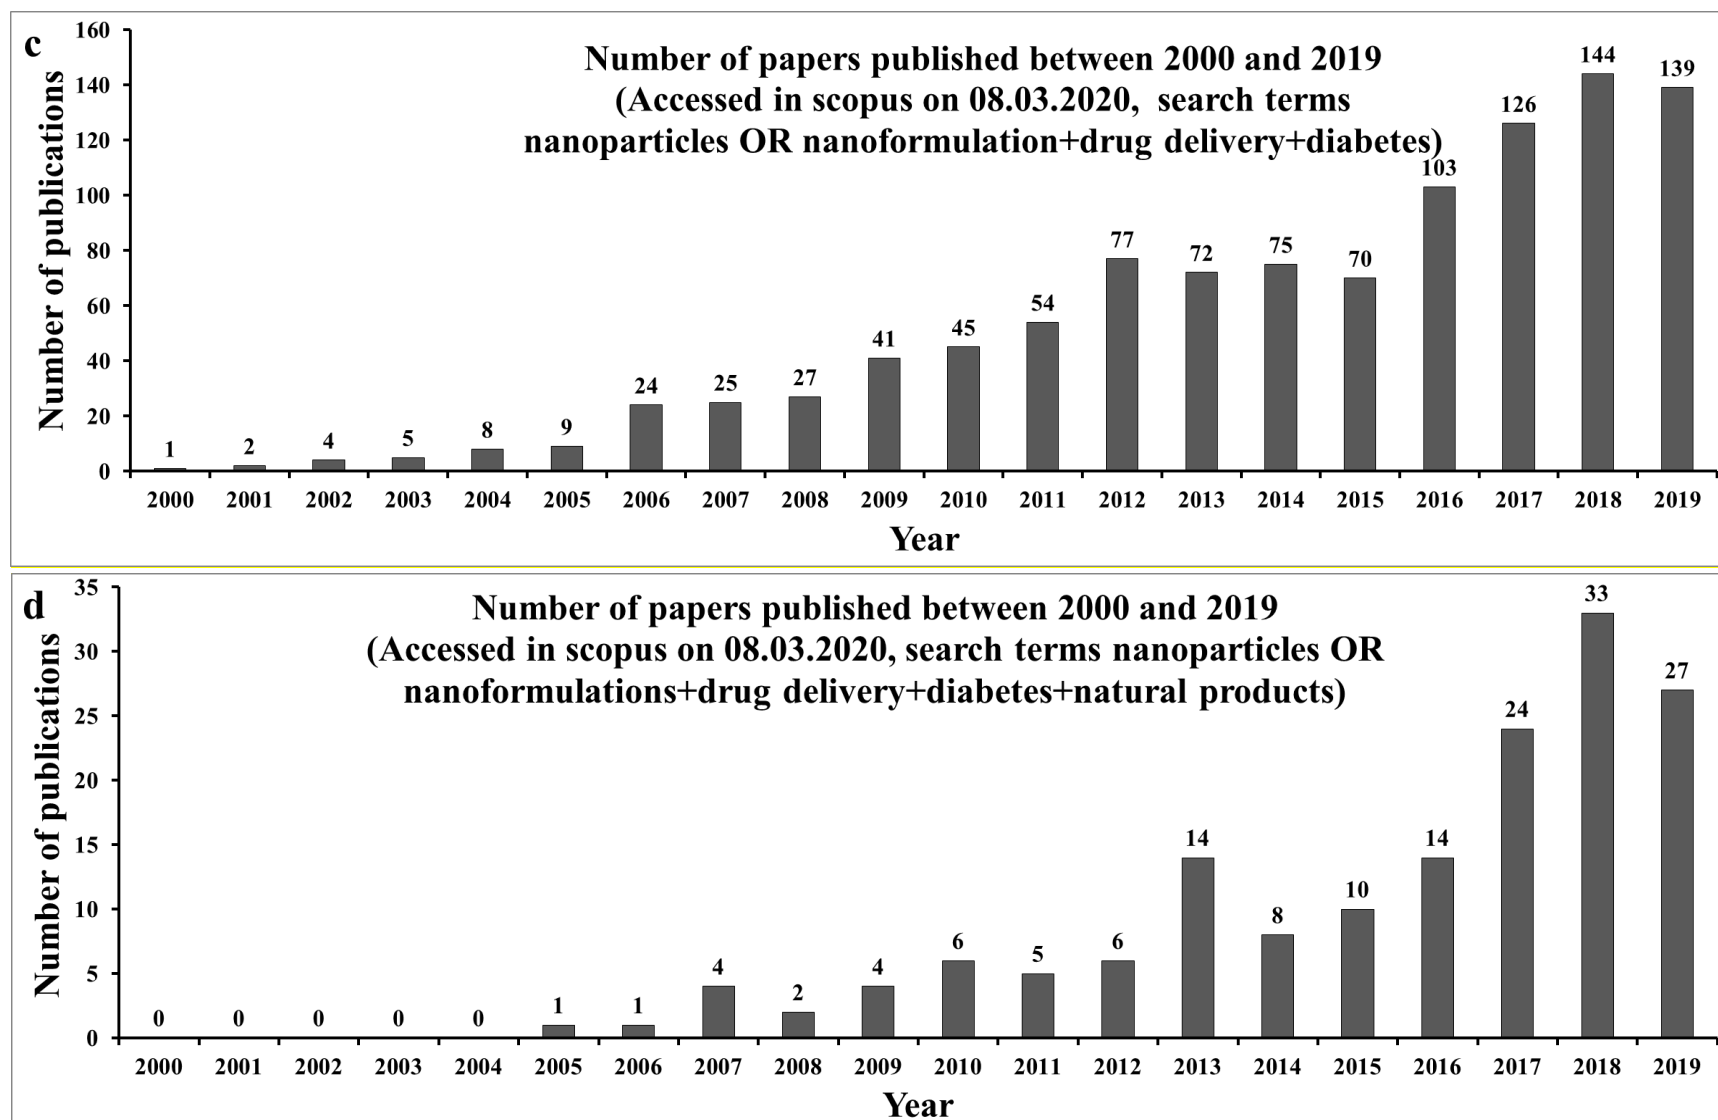

**Figure S1.** Statistics of research in the field of nanotechnology-based formulation development accessed in scopus on 08.03.2020. (a) Number of papers published between 2000 and 2019 with the search term nanoparticles OR nanoformulations+drug delivery; (b) Number of papers published between 2000 and 2019 with the search term nanoparticles OR nanoformulations+drug delivery+natural products; (c) Number of papers published between 2000 and 2019 with the search term nanoparticles OR nanoformulations+drug delivery+diabetes; (d) Number of papers published between 2000 and 2019 with the search term nanoparticles OR nanoformulations+drug delivery+diabetes+natural products.
