# Supplementary material for: Plant-Based Antidiabetic Nanoformulations: The Emerging Paradigm for Effective Therapy
Source: MDPI journal article supplement (doi:10.3390/ijms21062217), 2020-03-23
Supplement: s1 [file s1]

**Table S1.** Antidiabetic nanoformulations of crude natural products.

| S. no | Plants                                                                             | Nanoformulations                           | Models                            | Size (nm) | Outcomes                                                                                                                                                                                                                                                                                                                                                                                                                                                                                                                                                                                                                                                                                                                                                                                                             | References |
|-------|------------------------------------------------------------------------------------|--------------------------------------------|-----------------------------------|-----------|----------------------------------------------------------------------------------------------------------------------------------------------------------------------------------------------------------------------------------------------------------------------------------------------------------------------------------------------------------------------------------------------------------------------------------------------------------------------------------------------------------------------------------------------------------------------------------------------------------------------------------------------------------------------------------------------------------------------------------------------------------------------------------------------------------------------|------------|
| 1     | <i>Allium cepa</i> bulb                                                            | <i>A. cepa</i> -silver nanoparticles       | <i>In vitro</i> assays            | ~49-73    | Free radical ↓, α-glucosidase ↓, α-glucosidase ↓, cytotoxicity ↓.                                                                                                                                                                                                                                                                                                                                                                                                                                                                                                                                                                                                                                                                                                                                                    | [1]        |
| 2     | <i>Ananas comosus</i> outer peel                                                   | <i>A. comosus</i> -silver nanoparticles    | <i>In vitro</i> assays            | -         | Free radical ↓, reducing power ↑, NO ↓, α-glucosidase ↓.                                                                                                                                                                                                                                                                                                                                                                                                                                                                                                                                                                                                                                                                                                                                                             | [2]        |
| 3     | <i>Andrographis echiodides</i> (Syn: <i>Indoneesiella echiodides</i> ) whole plant | <i>A. echiodides</i> -silver nanoparticles | Streptozotocin-diabetic male rats | -         | Plasma glucose ↓, plasma insulin ↑, plasma hemoglobin ↑, plasma glycated hemoglobin ↓, plasma free fatty acids ↓, plasma phospholipids ↓, plasma triglycerides ↓, plasma cholesterol ↓, plasma HDL-cholesterol ↑, plasma LDL-cholesterol ↓, plasma VLDL-cholesterol ↓, serum AST ↓, serum ALT ↓, serum ALP ↓, serum GGT ↓, plasma urea ↓, plasma uric acid ↓, plasma creatinine ↓, plasma protein ↑, HK (liver and kidney) ↑, GK (liver and kidney) ↑, G6P (liver and kidney) ↑, G1,6DP (liver and kidney) ↑, G6PD (liver and kidney) ↑, lipid peroxidation (pancreas, liver, and kidney) ↓, hydroperoxides (pancreas, liver, and kidney) ↓, antioxidant enzymes (pancreas, liver, and kidney) ↑, GSH (pancreas, liver, and kidney) ↑, Vit C (pancreas, liver, and kidney) ↑, Vit E (pancreas, liver, and kidney) ↑. | [3]        |

|    |                                                     |                                                                  |                                   |         |                                                                                                                                                                                                                                                                                                                                                                                                                                       |       |
|----|-----------------------------------------------------|------------------------------------------------------------------|-----------------------------------|---------|---------------------------------------------------------------------------------------------------------------------------------------------------------------------------------------------------------------------------------------------------------------------------------------------------------------------------------------------------------------------------------------------------------------------------------------|-------|
| 4  | <i>Andrographis paniculata</i> leaf & herb          | <i>A. paniculata</i> -gold nanoparticles                         | <i>In vitro</i> assays            | ~57-115 | $\alpha$ -Amylase ↓, free radicals ↓, reducing power ↓, inflammation ↓, NO ↓.                                                                                                                                                                                                                                                                                                                                                         | [4,5] |
|    |                                                     | <i>A. paniculata</i> -casein micelle nanopreparation             | <i>In vitro</i> assay             | ~120    | $\alpha$ -Glucosidase ↓.                                                                                                                                                                                                                                                                                                                                                                                                              |       |
| 5  | <i>Antrodia cinnamomea</i> triterpenoids            | <i>A. cinnamomea</i> triterpenoids-silica-chitosan nanoparticles | <i>In vitro</i> assays            | ~79     | Cellular uptake ↑, cyto-toxicity ↓, inflammation ↓, NO ↓, superoxide ↓, Blood glucose ↓, insulin resistance ↓, testicular SOD ↑, testicular GPx ↑, testicular CAT ↑, testicular IL-6 ↓, testicular TNF- $\alpha$ ↓, plasma IFN- $\gamma$ ↓, plasma LH ↑, plasma testosterone ↑, plasma FSH ↑, ASK-1 ↓, c-JNK ↓, ATF-2 ↓, sperm count ↑, sperm mobility ↑, sperm abnormality ↓, sperm ROS ↓, sperm mitochondrial membrane potential ↑. | [6]   |
|    |                                                     |                                                                  | Streptozotocin-diabetic male rats |         |                                                                                                                                                                                                                                                                                                                                                                                                                                       |       |
| 6  | <i>Argyrea nervosa</i> leaf                         | <i>A. nervosa</i> -silver nanoparticles                          | <i>In vitro</i> assays            | ~5-40   | $\alpha$ -Glucosidase ↓, $\alpha$ -amylase ↓, free radical ↓.                                                                                                                                                                                                                                                                                                                                                                         | [7]   |
| 7  | <i>Avicennia officinalis</i> leaf                   | <i>A. officinalis</i> -silver nanoparticles                      | <i>In vitro</i> assays            | ~181    | $\alpha$ -Glucosidase ↓, $\alpha$ -amylase ↓, free radicals ↓, inflammation ↓.                                                                                                                                                                                                                                                                                                                                                        | [8]   |
| 8  | <i>Azadirachta indica</i> leaf                      | <i>A. indica</i> -zinc oxide nanoparticles                       | <i>In vitro</i> assays            | ~27-54  | $\alpha$ -Glucosidase ↓, $\alpha$ -amylase ↓, free radicals ↓, H <sub>2</sub> O <sub>2</sub> ↓.                                                                                                                                                                                                                                                                                                                                       | [9]   |
| 9  | <i>Barleria prionitis</i> leaf                      | <i>B. prionitis</i> -copper nanoparticles                        | <i>In vitro</i> assays            | ~11-15  | $\alpha$ -Glucosidase ↓, $\alpha$ -amylase ↓.                                                                                                                                                                                                                                                                                                                                                                                         | [10]  |
| 10 | <i>Bauhinia variegata</i> flower                    | <i>B. variegata</i> -silver nanoparticles                        | <i>In vitro</i> assays            | ~5-15   | $\alpha$ -Amylase ↓, free radicals ↓.                                                                                                                                                                                                                                                                                                                                                                                                 | [11]  |
| 11 | <i>Botryodiplodia theobromae</i> , endophytic fungi | <i>B. theobromae</i> -silver nanoparticles                       | <i>In vitro</i> assay             | ~53-79  | $\alpha$ -Amylase ↓.                                                                                                                                                                                                                                                                                                                                                                                                                  | [12]  |

|    |                                                  |                                                                        |                                                     |        |                                                                                                                                                                                                                                              |      |
|----|--------------------------------------------------|------------------------------------------------------------------------|-----------------------------------------------------|--------|----------------------------------------------------------------------------------------------------------------------------------------------------------------------------------------------------------------------------------------------|------|
| 12 | <i>Breynia retusa</i> leaf                       | <i>B. retusa</i> -silver nanoparticles                                 | <i>In vitro</i> assays                              | ~30-40 | $\alpha$ -Amylase ↓.                                                                                                                                                                                                                         | [13] |
| 13 | <i>Caesalpinia coriaria</i> leaf and bark        | <i>C. coriaria</i> -silver nanoparticles                               | <i>In vitro</i> assays                              | -      | Glucose uptake (yeast cells) ↑, inflammation ↓.                                                                                                                                                                                              | [14] |
| 14 | <i>Calophyllum tomentosum</i> leaf               | <i>C. tomentosum</i> -silver nanoparticles                             | <i>In vitro</i> assays                              | ~24    | Free radicals ↓, reducing power ↑, NO ↓, inflammation ↓, lipoxygenase ↓, xanthine oxidase ↓, $\alpha$ -glucosidase ↓, DPP-4 ↓, $\alpha$ -amylase ↓.                                                                                          | [15] |
| 15 | <i>Cassia fistula</i> bark                       | <i>Cassia fistula</i> -gold nanoparticles                              | Streptozotocin-diabetic male rats                   | ~55-98 | Blood glucose ↓, serum triglycerides ↓, serum cholesterol ↓, serum HDL-cholesterol ↑, serum LDL-cholesterol ↓, serum VLDL-cholesterol ↓, serum AST ↓, serum ALT ↓, serum ALP ↓, serum urea ↓, serum uric acid ↓, serum creatinine ↓.         | [16] |
| 16 | <i>Cassia grandis</i> fruit                      | <i>C. grandis</i> -Eudragit L 100 55-PEG 4000-Kollicoat nanodispersion | <i>In vitro</i> assays<br><br>Alloxan-diabetic mice | ~106   | Stability ↑, lipase ↓, $\alpha$ -glucosidase ↓, free radicals ↓, cyto-toxicity ↓.<br>Blood glucose ↓, body weight ↑, food intake ↑, water intake ↓.                                                                                          | [17] |
| 17 | <i>Catathelasma ventricosum</i> polysaccharides  | <i>C. ventricosum</i> polysaccharides-selenium nanoparticles           | Streptozotocin-diabetic mice                        | ~50    | Blood glucose ↓, body weight ↑, serum triglycerides ↓, serum cholesterol ↓, serum HDL-cholesterol ↑, serum LDL-cholesterol ↓, lipid peroxidation (liver and kidney), SOD (liver and kidney), CAT (liver and kidney), GPx (liver and kidney). | [18] |
| 18 | <i>Catharanthus roseus</i> var. <i>alba</i> leaf | <i>C. roseus</i> -chitosan nanoparticles                               | Alloxan-diabetic rats                               | -      | Blood glucose ↓, glucose tolerance ↑, body weight ↑, SOD (plasma and liver) ↑, CAT (plasma and liver) ↑, GSH                                                                                                                                 | [19] |

|    |                                     |                                                  |                                   |        |                                                                                                                                                         |      |
|----|-------------------------------------|--------------------------------------------------|-----------------------------------|--------|---------------------------------------------------------------------------------------------------------------------------------------------------------|------|
|    |                                     |                                                  |                                   |        | (plasma and liver) ↑.                                                                                                                                   |      |
| 19 | <i>Centella asiatica</i> leaf       | <i>C. asiatica</i> -silver nanoparticles         | <i>In vitro</i> assays            | ~30-50 | Glucose uptake (yeast cells) ↑, non-enzymatic hemoglobin glycosylation ↓, hemoglobin ↑, α-amylase ↓, free radicals ↓, H <sub>2</sub> O <sub>2</sub> ↓.  | [20] |
| 20 | <i>Chamaecostus cuspidatus</i> leaf | <i>C. cuspidatus</i> -gold nanoparticles         | <i>In vitro</i> assays            | ~50    | Free radicals ↓, reducing power ↑, NO ↓, lipid peroxidation ↓.                                                                                          | [21] |
|    |                                     |                                                  | Streptozotocin-diabetic male rats |        | Blood glucose ↓, insulin ↑, glycogen ↑, body weight ↑, serum protein ↑, serum cholesterol ↓, diabetic wound ↓.                                          |      |
| 21 | <i>Chromolaena odorata</i> leaf     | <i>C. odorata</i> -silver nanoparticles          | <i>In vitro</i> assays            | -      | Glucose uptake (yeast) ↑, inflammation ↓.                                                                                                               | [14] |
| 22 | <i>Cinnamomum cassia</i> bark       | <i>C. cassia</i> -silver-gold nanoparticles      | Streptozotocin-diabetic male rats | ~45    | Blood glucose ↓, insulin sensitivity ↑, body weight ↓.                                                                                                  | [22] |
|    |                                     | <i>C. cassia</i> -silver nanoparticles           | Streptozotocin-diabetic male rats | ~100   | Blood glucose ↓, serum urea ↓, serum creatinine ↓, serum AST ↓, serum ALT ↓, serum ALP ↓, lipid peroxidation (kidney) ↓, GSH (kidney) ↑, body weight ↑. | [23] |
| 23 | <i>Cinnamomum tsoi</i> leaf         | <i>C. tsoi</i> -silver nanoparticles             | <i>In vitro</i> assays            | ~10-30 | α-Glucosidase ↓, α-amylase ↓.                                                                                                                           | [24] |
| 24 | <i>Citrus limon</i> fruit           | <i>C. limon</i> -zinc oxide nanoparticles        | <i>In vitro</i> assays            | ~11-49 | α-Glucosidase ↓, cyto-toxicity ↓.                                                                                                                       | [25] |
| 25 | <i>Cladosporium</i> species         | <i>Cladosporium</i> species-silver nanoparticles | <i>In vitro</i> assays            | ~24    | DPP-4 ↓, α-glucosidase ↓, α-amylase ↓, glucose uptake (3T3L1 adipocytes) ↑, antioxidant activity ↑.                                                     | [26] |
| 26 | <i>Clausena anisata</i> root        | <i>C. anisata</i> -silver nanoparticles          | <i>In vitro</i> assays            | ~33    | Glucose uptake (yeast cells) ↓, glucose diffusion ↓, α-amylase ↓, glucose binding ↑, free radical ↓.                                                    | [27] |
|    | <i>Clausena anisata</i> leaf        | <i>C. anisata</i> -silver nanoparticles          | <i>In vitro</i> assays            | ~61    | Glucose uptake (yeast cells) ↓, glucose                                                                                                                 | [28] |

|    |                                          |                                                                       |                                   |        |  |                                                                                                                                                                                                                                                                                                                                                                 |         |
|----|------------------------------------------|-----------------------------------------------------------------------|-----------------------------------|--------|--|-----------------------------------------------------------------------------------------------------------------------------------------------------------------------------------------------------------------------------------------------------------------------------------------------------------------------------------------------------------------|---------|
|    |                                          |                                                                       |                                   |        |  | diffusion ↓, α-amylase ↓, glucose binding ↑, free radical ↓.                                                                                                                                                                                                                                                                                                    |         |
| 27 | <i>Colpomenia sinuosa</i> , marine algae | <i>C. sinuosa</i> -silver nanoparticles                               | <i>In vitro</i> assays            | ~54-65 |  | α-Glucosidase ↓, α-amylase ↓.                                                                                                                                                                                                                                                                                                                                   | [29]    |
| 28 | <i>Corchorus depressus</i> whole plant   | <i>C. depressus</i> -silver nanoparticles                             | <i>In vitro</i> assays            | ~2-10  |  | α-Glucosidase ↓.                                                                                                                                                                                                                                                                                                                                                | [30]    |
| 29 | <i>Costus igneus</i> leaf                | <i>C. igneus</i> -zinc oxide nanoparticles                            | <i>In vitro</i> assays            | ~27    |  | Free radicals ↓, α-glucosidase ↓, α-amylase ↓.                                                                                                                                                                                                                                                                                                                  | [31,32] |
|    |                                          | <i>C. igneus</i> -gold nanoparticles                                  | <i>In vitro</i> assay             | ~50-60 |  | Glucose concentration ↓.                                                                                                                                                                                                                                                                                                                                        |         |
| 30 | <i>Costus pictus</i> leaf                | <i>C. pictus</i> -silver nanoparticles                                | <i>In vitro</i> assays            | -      |  | Glucose uptake (yeast cells) ↓, non-enzymatic hemoglobin glycosylation ↓, α-glucosidase ↓, α-amylase ↓.                                                                                                                                                                                                                                                         | [33]    |
| 31 | <i>Costus speciosus</i> leaf             | <i>C. speciosus</i> -loaded PLGA nanoparticles                        | Streptozotocin-diabetic male rats | ~4-12  |  | Sustained release ↑, therapeutic dose ↓, blood glucose ↓, serum triglycerides ↓, serum cholesterol ↓, serum HDL-cholesterol ↑, serum LDL-cholesterol ↓, serum AST ↓, serum ALT ↓, serum LDH ↓, serum ALP ↓, serum ACP ↓, hepatocellular DNA damage ↓, pancreatic insulin-I mRNA ↑, pancreatic insulin-II mRNA ↑, hepatic GLUT-2 mRNA ↑, muscular GLUT-4 mRNA ↑. | [34,35] |
|    |                                          | <i>C. speciosus</i> -platinum modified titanium dioxide nanoparticles | <i>In vitro</i> assays            | ~10-50 |  | Free radicals ↓, H <sub>2</sub> O <sub>2</sub> ↓, reducing power ↑, α-amylase ↓.                                                                                                                                                                                                                                                                                |         |
| 32 | <i>Couroupita guianensis</i> flower      | <i>C. guianensis</i> -coated gold nanoparticles                       | Streptozotocin-diabetic rats      | ~47    |  | Blood glucose ↓, glycated haemoglobin ↓, serum insulin ↑, serum triglycerides ↓, serum cholesterol ↓, serum HDL-                                                                                                                                                                                                                                                | [36]    |

|    |                                         |                                                                                                                                          |                                                              |                   |                                                                                                                                                                                                        |      |
|----|-----------------------------------------|------------------------------------------------------------------------------------------------------------------------------------------|--------------------------------------------------------------|-------------------|--------------------------------------------------------------------------------------------------------------------------------------------------------------------------------------------------------|------|
|    |                                         |                                                                                                                                          |                                                              |                   | cholesterol ↑, serum AST ↓, serum ALT ↓, serum ALP ↓, serum urea ↓, serum creatinine ↓, serum bilirubin ↓, serum protein ↑, SOD (liver) ↑, CAT (liver) ↑, GPx (liver) ↑, lipid peroxidation (liver) ↓. |      |
| 33 | <i>Curcuma longa</i> leaf               | <i>C. longa</i> -silver nanoparticles                                                                                                    | <i>In vitro</i> assays                                       | ~90-111           | Free radicals ↓, reducing power ↑, α-amylase ↓, NO ↓.                                                                                                                                                  | [37] |
| 34 | <i>Cymbopogon citratus</i> leaf         | <i>C. citratus</i> -silver nanoparticles                                                                                                 | <i>In vitro</i> assays                                       | ~75-138           | α-Amylase ↓, glucose diffusion ↓.                                                                                                                                                                      | [38] |
| 35 | <i>Dioscorea bulbifera</i> tuber        | <i>D. bulbifera</i> -copper nanoparticles                                                                                                | <i>In vitro</i> assays                                       | ~12-16            | Free radicals ↓, α-glucosidase ↓, α-amylase ↓, NO ↓, superoxide ↓.                                                                                                                                     | [39] |
| 36 | <i>Diospyros melanoxylon</i> leaf       | <i>D. melanoxylon</i> -PLGA nanoparticles                                                                                                | <i>In vitro</i> assays                                       | ~366              | α-Glucosidase ↓, α-amylase ↓.                                                                                                                                                                          | [40] |
| 37 | <i>Dunaliella bardawil</i> biomass      | <i>Dunaliella bardawil</i> -encapsulated keratin nanoparticles                                                                           | <i>In vitro</i> (3T3-L1 adipocytes), <i>in silico</i> assays | ~159              | Stability ↑, sustained release of <i>D. bardawil</i> biomass ↑, glucose uptake ↑, PTP1B ↓, AMPK ↑, GLUT-4 translocation ↑, cytotoxicity ↓.                                                             | [41] |
| 38 | <i>Enhalus acoroides</i> , sea grass    | <i>E. acoroides</i> -silver nanoparticles                                                                                                | <i>In vitro</i> assay                                        | ~2-100            | α-Glucosidase ↓.                                                                                                                                                                                       | [42] |
| 39 | <i>Eysenhardtia polystachya</i> bark    | <i>E. polystachya</i> -silver nanoparticles                                                                                              | <i>In vitro</i> assays                                       | ~10-100           | Stability ↑, sustained release of <i>E. polystachya</i> ↑, β-cell survival ↑, Insulin secretion ↑, cyto-toxicity ↓.                                                                                    | [43] |
|    |                                         |                                                                                                                                          | Glucose-fed zebrafish                                        |                   | Glucose ↓, triglycerides ↓, cholesterol ↓.                                                                                                                                                             |      |
| 40 | <i>Gnidia glauca</i> flower, leaf, stem | <i>G. glauca</i> flower-copper nanoparticles<br><i>G. glauca</i> leaf-copper nanoparticles<br><i>G. glauca</i> stem-copper nanoparticles | <i>In vitro</i> assays                                       | ~5<br>~70-93<br>- | α-Glucosidase ↓, α-amylase ↓.                                                                                                                                                                          | [44] |

|    |                                      |                                                          |                                                       |           |                                                                                                                                                                                                                                          |         |
|----|--------------------------------------|----------------------------------------------------------|-------------------------------------------------------|-----------|------------------------------------------------------------------------------------------------------------------------------------------------------------------------------------------------------------------------------------------|---------|
| 41 | <i>Gymnema sylvestre</i> leaf        | <i>G. sylvestre</i> -chitosan nanoparticles              | Streptozotocin-diabetic male rats                     | ~50-120   | Blood glucose ↓, glyoxylated haemoglobin ↓, AST ↓, ALT ↓, ALP ↓, GSH (liver & kidney) ↑, SOD (liver & kidney) ↑, CAT (liver & kidney) ↑, lipid peroxidation (liver & kidney) ↓.                                                          | [45-48] |
|    |                                      | <i>G. sylvestre</i> -gold nanoparticles                  | Alloxan-diabetic mice                                 | ~50       | Blood glucose ↓, plasma insulin ↑, plasma glycated haemoglobin ↓, plasma haemoglobin ↑, plasma triglycerides ↓, plasma cholesterol ↓, plasma HDL-cholesterol ↑, plasma LDL-cholesterol ↓, plasma TNF-α ↓, plasma IL-1β ↓, plasma IL-6 ↓. |         |
|    |                                      | <i>G. sylvestre</i> -chitosan reduced gold nanoparticles | High fat diet + low dose streptozotocin-diabetic rats | ~14       | Hyperglycemia ↓, hyperlipidemia ↓, vascular tissue damage ↓, GLUT-4 ↑, PPAR-γ ↑.                                                                                                                                                         |         |
|    |                                      | <i>G. sylvestre</i> -silver nanoparticles                | Streptozotocin-diabetic male rats                     | -         | Blood glucose ↓, serum cholesterol ↓, serum triglycerides ↓, serum LDL-cholesterol ↓, serum VLDL-cholesterol ↓.                                                                                                                          |         |
| 42 | <i>Halymenia poryphyroides</i> algae | <i>H. poryphyroides</i> -silver nanoparticles            | <i>In vitro</i> assays                                | ~34-80    | α-Glucosidase ↓, α-amylase ↓.                                                                                                                                                                                                            | [49]    |
| 43 | <i>Helianthus tuberosus</i> tuber    | <i>H. tuberosus</i> -gold nanoparticles                  | Glucose-fed rats                                      | ~10       | Glucose tolerance ↑, blood glucose ↓.                                                                                                                                                                                                    | [50]    |
| 44 | <i>Heritiera fomes</i> bark          | <i>H. fomes</i> -silver nanoparticles                    | <i>In vitro</i> assays                                | ~400 (WR) | α-Amylase ↓, free radical ↓,                                                                                                                                                                                                             | [51]    |
|    |                                      | <i>H. fomes</i> -zinc oxide nanoparticles                |                                                       | ~40-50    | inflammation ↓.                                                                                                                                                                                                                          |         |
| 45 | <i>Hibiscus rosa-sinensis</i> leaf   | <i>H. rosa-sinensis</i> -zinc oxide nanoparticles        | <i>In vitro</i> assays                                | ~27-54    | α-Glucosidase ↓, α-amylase ↓, free radicals ↓, H <sub>2</sub> O <sub>2</sub> ↓.                                                                                                                                                          | [9]     |
| 46 | <i>Hibiscus subdariffa</i> leaf      | <i>Hibiscus subdariffa</i> -zinc oxide nanoparticles     | Streptozotocin-diabetic male rats                     | ~16-60    | Blood glucose ↓, pancreatic TNF-α protein and gene ↓, pancreatic IL-6                                                                                                                                                                    | [52]    |

|    |                                                                                                                                |                                                                                           |                                       |            |                                                                                                                                                                                                                              |      |
|----|--------------------------------------------------------------------------------------------------------------------------------|-------------------------------------------------------------------------------------------|---------------------------------------|------------|------------------------------------------------------------------------------------------------------------------------------------------------------------------------------------------------------------------------------|------|
|    |                                                                                                                                |                                                                                           |                                       |            | protein and gene ↓, pancreatic IL-1β protein and gene ↓, pancreatic IL-4 protein and gene ↑, pancreatic IL-10 protein and gene ↑, pancreatic IR A mRNA ↑, pancreatic PKLR mRNA ↓, pancreatic GLUT-2 ↑, pancreatic GK mRNA ↑, |      |
| 47 | <i>Holoptelea integrifolia</i> leaf                                                                                            | <i>H. integrifolia</i> -silver nanoparticles                                              | <i>In vitro</i> assays                | ~32-38     | Free radical ↓, metal chelating ↑, NO ↓, inflammation ↓, α-amylase ↓.                                                                                                                                                        | [53] |
| 48 | <i>Ipomoea batatas</i> peels<br>Korean red skin sweet<br>potato variety (IB1), Korean<br>pumpkin sweet potato<br>variety (IB2) | IB1-silver nanoparticles and<br>IB2-silver nanoparticles                                  | <i>In vitro</i> assays                | -          | Free radical ↓, α-glucosidase ↓ (IC50 = 0.36 and 0.77 µg/ml for IB1-silver and IB2-silver nanoparticles, respectively), cyto-toxicity ↓.                                                                                     | [54] |
| 49 | <i>Lawsonia inermis</i> leaf                                                                                                   | <i>L. inermis</i> -silver nanoparticles<br><i>L. inermis</i> - cerium oxide nanoparticles | Streptozotocin-<br>diabetic male rats | ~15<br>~18 | Blood glucose ↓, serum insulin ↑, serum triglycerides ↓, serum cholesterol ↓, serum HDL-cholesterol ↑, serum LDL-cholesterol ↓, serum VLDL-cholesterol ↓. (silver nanoparticles effect > cerium oxide nanoparticles effect)  | [55] |
| 50 | <i>Lentinus tuber-regium</i> ,<br>musroom                                                                                      | <i>L. tuber-regium</i> -silver nanoparticles                                              | <i>In vitro</i> assays                | ~5-35      | α-Amylase ↓.                                                                                                                                                                                                                 | [56] |
| 51 | <i>Litchi chinensis</i> peel                                                                                                   | <i>L. chinensis</i> -copper nanoparticles                                                 | <i>In vitro</i> assays                | ~10-100    | α-Glucosidase ↓, α-amylase ↓.                                                                                                                                                                                                | [10] |
| 52 | <i>Lonicera japonica</i> leaf                                                                                                  | <i>L. japonica</i> -silver nanoparticles                                                  | <i>In vitro</i> assays                | ~20-60     | Free radicals ↓, α-glucosidase ↓, α-amylase ↓.                                                                                                                                                                               | [57] |
| 53 | <i>Manilkara zapota</i> leaf and<br>stem                                                                                       | <i>M. zapota</i> -silver nanoparticles                                                    | <i>In vitro</i> assays                | -          | Free radicals ↓, reducing power ↑, α-amylase ↓.                                                                                                                                                                              | [58] |



|    |                                                 |                                                                                 |                                                                              |          |                                                                                                                                                                                                                                     |         |
|----|-------------------------------------------------|---------------------------------------------------------------------------------|------------------------------------------------------------------------------|----------|-------------------------------------------------------------------------------------------------------------------------------------------------------------------------------------------------------------------------------------|---------|
| 54 | <i>Marsilea quadrifolia</i> , water fern        | <i>M. quadrifolia</i> -gold nanoparticles                                       | <i>In vitro</i> assays                                                       | ~14      | Glucose uptake (3T3L1 adipocytes) ↑, cyto-toxicity (3T3L1 adipocytes) low.                                                                                                                                                          | [59]    |
| 55 | <i>Momordica charantia</i> fruit                | <i>M. charantia</i> -silver nanoparticles                                       | Streptozotocin-diabetic rats                                                 | ~100     | Blood glucose ↓, insulin ↑.                                                                                                                                                                                                         | [60,61] |
|    |                                                 | <i>M. charantia</i> -zinc oxide nanoparticles                                   | Streptozotocin-diabetic rats                                                 | ~25      | Blood glucose ↓, insulin ↑.                                                                                                                                                                                                         |         |
| 56 | <i>Moricandia nitens</i> whole plant            | <i>M. nitens</i> -gold nanoparticles                                            | <i>In vitro</i> assay                                                        | ~5-30    | α-Glucosidase ↓.                                                                                                                                                                                                                    | [62]    |
| 57 | <i>Moringa oleifera</i> leaf                    | <i>M. oleifera</i> -zinc oxide nanoparticles                                    | <i>In vitro</i> assays                                                       | ~27-54   | α-Glucosidase ↓, α-amylase ↓, free radicals ↓, H <sub>2</sub> O <sub>2</sub> ↓.                                                                                                                                                     | [9]     |
| 58 | <i>Morus nigra</i> fruit                        | <i>Morus nigra</i> - cerium oxide nanoparticles                                 | <i>In vitro</i> assays                                                       | ~7.5     | Glucose uptake (L6 skeletal muscle cells) ↑, cyto-toxicity ↓.                                                                                                                                                                       | [63]    |
| 59 | <i>Morus alba</i> leaf + <i>Pueraria Lobata</i> | Selenium-layered <i>M.alba</i> - <i>P. Lobata</i> -PLGA-PEG-DOTAP nanoparticles | <i>In vitro</i> assays<br>Sprague-Dawley rats<br>Goto-Kakizaki diabetic rats | ~120     | Stability ↑, sustained release ↑, cellular uptake ↑, glucose uptake (adipocytes) ↑. Bioavailability ↑, blood glucose ↓. Blood glucose ↓, β-cells ↑, blood ROS ↓, blood lipid peroxidation ↓, blood SOD ↑, blood GPx ↑, blood GSH ↑. | [64]    |
| 60 | <i>Murraya koenigii</i> leaf                    | <i>M. koenigii</i> -zinc oxide nanoparticles                                    | <i>In vitro</i> assays                                                       | ~27-54   | α-Glucosidase ↓, α-amylase ↓, free radicals ↓, H <sub>2</sub> O <sub>2</sub> ↓.                                                                                                                                                     | [9]     |
| 61 | <i>Nasturtium officinale</i> leaf               | <i>N. officinale</i> -zinc oxide nanoparticles                                  | Alloxan-diabetic rats                                                        | ~14      | Stability ↑, blood glucose ↓, insulin ↑, triglycerides ↓, cholesterol ↓, HDL-cholesterol ↑.                                                                                                                                         | [65]    |
| 62 | <i>Nigella Sativa</i> seed                      | <i>N. Sativa</i> -PLGA nanoparticles                                            | High fat diet + low dose streptozotocin-diabetic rats                        | ~50-94   | Ischemia-modified albumin ↓, lipid peroxidation ↓ (insignificant).                                                                                                                                                                  | [66]    |
| 63 | <i>Nilgiranthus ciliates</i> fresh plant        | <i>N. ciliates</i> -loaded gelatin nanoparticles                                | <i>In vitro</i> assays                                                       | ~116-160 | Stability ↑, cyto-toxicity ↓, glucose uptake (L6 skeletal muscle cells) ↑,                                                                                                                                                          | [67]    |

|    |                                             |                                                  |                                                       |         |                                                                                                                                                           |         |
|----|---------------------------------------------|--------------------------------------------------|-------------------------------------------------------|---------|-----------------------------------------------------------------------------------------------------------------------------------------------------------|---------|
|    |                                             |                                                  |                                                       |         | adipogenesis (3T3-L1 adipocytes) ↓,<br>lipid accumulation (3T3-L1 adipocytes)<br>↓.                                                                       |         |
| 64 | <i>Ocimum basilicum</i> leaf                | <i>O. basilicum</i> -silver nanoparticles        | <i>In vitro</i> assays                                | ~100    | α-Glucosidase ↓, α-amylase ↓.                                                                                                                             | [68,69] |
|    |                                             | <i>O. basilicum</i> -silver-gold nanoparticles   | <i>In vitro</i> assays                                | ~3-25   | α-Glucosidase ↓, α-amylase ↓.                                                                                                                             |         |
| 65 | <i>Ocimum sanctum</i> leaf                  | <i>O. sanctum</i> -silver nanoparticles          | <i>In vitro</i> assays                                | ~100    | α-Glucosidase ↓, α-amylase ↓.                                                                                                                             | [68]    |
| 67 | <i>Padina boergeresii</i> , brown seaweed   | <i>P. boergeresii</i> -gold nanoparticles        | <i>In vitro</i> assay                                 | ~2-100  | α-Glucosidase ↓.                                                                                                                                          | [70]    |
| 68 | <i>Parmelia perlata</i> lichen              | <i>P. perlata</i> -silver nanoparticles          | <i>In vitro</i> assays                                | ~10-100 | α-Amylase ↓, antioxidant activity ↑,<br>reducing power ↑, H <sub>2</sub> O <sub>2</sub> ↓.                                                                | [71]    |
| 69 | <i>Phyllanthus emblica</i> fruit            | <i>P. emblica</i> -PLGA nanoparticles            | Streptozotocin-diabetic rats                          | -       | Blood glucose ↓, hepatic DNA damage ↓,<br>hepatocellular GK mRNA ↑, hepatic<br>hepatic G6Pase mRNA ↓, GLUT-2<br>mRNA ↑, muscular GLUT-4 mRNA ↑,<br>GPx ↑. | [72]    |
| 70 | <i>Pisum sativum</i> outer peel             | <i>P. sativum</i> -silver nanoparticles          | <i>In vitro</i> assays                                | ~10-25  | α-Glucosidase ↓, free radical ↓.                                                                                                                          | [73]    |
| 71 | <i>Platanus orientalis</i> leaf             | <i>P. orientalis</i> -copper nanoparticles       | <i>In vitro</i> assays                                | ~90-200 | α-Glucosidase ↓, α-amylase ↓.                                                                                                                             | [10]    |
| 72 | <i>Pleurotus giganteus</i> , mushroom       | <i>P. giganteus</i> -silver nanoparticles        | <i>In vitro</i> assays                                | ~2-20   | α-Amylase ↓.                                                                                                                                              | [74]    |
| 73 | <i>Plicosepalus acacia</i> whole plant      | <i>P. acacia</i> -solid lipid nanoparticles      | High fat diet + low dose streptozotocin-diabetic rats | ~22-70  | Blood glucose ↓, glycated haemoglobin ↓,<br>insulin resistance ↓, insulin sensitivity<br>↑, lipid peroxidation ↓, GSH ↑, SOD ↑,<br>CAT ↑.                 | [75]    |
| 74 | <i>Plicosepalus curviflorus</i> whole plant | <i>P. curviflorus</i> -solid lipid nanoparticles | High fat diet + low dose streptozotocin-              | ~22-70  | Blood glucose ↓, glycated haemoglobin ↓,<br>insulin resistance ↓, insulin sensitivity                                                                     | [75]    |

|    |                                            |                                                |                                                           |         |                                                                                                                                                                                                                                                                                                               |      |
|----|--------------------------------------------|------------------------------------------------|-----------------------------------------------------------|---------|---------------------------------------------------------------------------------------------------------------------------------------------------------------------------------------------------------------------------------------------------------------------------------------------------------------|------|
|    |                                            |                                                | diabetic rats                                             |         | ↑, lipid peroxidation ↓, GSH ↑, SOD ↑, CAT ↑.                                                                                                                                                                                                                                                                 |      |
| 75 | <i>Plumbago zeylanica</i> leaf             | <i>P. zeylanica</i> leaf-copper nanoparticles  | <i>In vitro</i> assays                                    | ~1-5    | α-Glucosidase ↓, α-amylase ↓.                                                                                                                                                                                                                                                                                 | [44] |
| 77 | <i>Pouteria sapota</i> leaf                | <i>P. sapota</i> -silver nanoparticles         | <i>In vitro</i> assay<br><br>Streptozotocin-diabetic rats | ~20-110 | Glucose uptake ↑, non-enzymatic hemoglobin glycosylation ↓, α-glucosidase ↓.<br>Blood glucose ↓, serum insulin ↑, serum AST ↓, serum ALT ↓, serum ALP ↓, serum urea ↓, serum uric acid ↓, serum creatinine ↓, serum bilirubin ↓, serum protein ↑, SOD (liver) ↑, CAT (liver) ↑, lipid peroxidation (liver) ↓. | [76] |
| 78 | <i>Psoralea corylifolia</i> seed           | <i>P. corylifolia</i> -silver nanoparticles    | <i>In vitro</i> assay                                     | ~15-25  | PTP1B ↓.                                                                                                                                                                                                                                                                                                      | [77] |
| 79 | <i>Pterocarpus marsupium</i> bark and wood | <i>P. marsupium</i> -silver nanoparticles      | <i>In vitro</i> assay                                     | ~148.5  | α-glucosidase ↓.                                                                                                                                                                                                                                                                                              | [78] |
| 80 | <i>Pterocarpus santalinus</i> wood         | <i>P. santalinus</i> -zinc oxide nanoparticles | <i>In vitro</i> assays                                    | ~20     | α-Glucosidase ↓, α-amylase ↓.                                                                                                                                                                                                                                                                                 | [79] |
| 81 | <i>Punica granatum</i> leaf                | <i>P. granatum</i> -silver nanoparticles       | <i>In vitro</i> assays                                    | ~35-60  | Free radicals ↓, α-glucosidase ↓, α-amylase ↓.                                                                                                                                                                                                                                                                | [80] |
| 83 | <i>Rumex hymenosepalus</i> root            | <i>R. hymenosepalus</i> -silver nanoparticles  | Streptozotocin-diabetic rats                              | ~6-12   | Blood glucose ↓, glucose tolerance ↑.                                                                                                                                                                                                                                                                         | [81] |
| 84 | <i>Sambucus nigra</i> fruit                | <i>S. nigra</i> -gold nanoparticles            | Streptozotocin-diabetic rats                              | ~4-26   | Blood glucose ↓ (insignificant), serum insulin ↑ (insignificant), serum cholesterol ↓ (insignificant), serum AST ↓, lipid peroxidation (liver) ↓, GSH/GSSG (blood) ↑, COX-2 (liver) ↓, Pro-MMP-2 (liver) ↓, Kupffer cells ↓.                                                                                  | [82] |

|    |                                               |                                                                                                                         |                                                           |                     |                                                                                                                                                                                                                                                                                                     |         |
|----|-----------------------------------------------|-------------------------------------------------------------------------------------------------------------------------|-----------------------------------------------------------|---------------------|-----------------------------------------------------------------------------------------------------------------------------------------------------------------------------------------------------------------------------------------------------------------------------------------------------|---------|
| 85 | <i>Saraca asoca</i> leaf                      | <i>S. asoca</i> -gold nanoparticles<br><i>S. asoca</i> -silver nanoparticles                                            | <i>In vitro</i> assay                                     | ~24<br>~36          | $\alpha$ -Amylase ↓ (IC <sub>50</sub> : 1.5 mM)<br>$\alpha$ -Amylase ↓ (IC <sub>50</sub> : 0.35 mM)                                                                                                                                                                                                 | [83]    |
| 86 | <i>Sargassum swartzii</i>                     | <i>S. swartzii</i> -gold nanoparticles                                                                                  | Alloxan-diabetic rats                                     | ~37                 | Blood glucose ↓, glycated haemoglobin ↓, haemoglobin ↑, plasma insulin ↑, serum triglycerides ↓, serum cholesterol ↓, serum HDL-cholesterol ↑, serum LDL-cholesterol ↓, serum AST ↓, serum ALT ↓, serum ALP ↓, serum creatinine ↓, serum IL-6 ↓, serum TNF- $\alpha$ ↓, serum high-sensitive CRP ↓. | [84]    |
| 87 | <i>Sesamum indicum</i> seed                   | <i>S. indicum</i> -iron nanoparticles                                                                                   | <i>In vitro</i> assay                                     | ~99                 | $\alpha$ -Amylase ↓.                                                                                                                                                                                                                                                                                | [85]    |
| 88 | <i>Silybum marianum</i> seed                  | <i>S. marianum</i> -zinc oxide nanoparticles                                                                            | Alloxan-diabetic rats                                     | ~25                 | Blood glucose ↓, serum insulin ↑, serum triglycerides ↓, serum cholesterol ↓, serum HDL-cholesterol ↑.                                                                                                                                                                                              | [86]    |
| 89 | <i>Solanum nigrum</i> leaf                    | <i>S. nigrum</i> -silver nanoparticles                                                                                  | Alloxan-diabetic rats                                     | ~4-25               | Blood glucose ↓, glucose tolerance ↑, body weight ↑, serum triglycerides ↓, serum cholesterol ↓.                                                                                                                                                                                                    | [87]    |
| 90 | <i>Sonneratia apetala</i> leaf                | <i>S. apetala</i> -silver nanoparticles<br><i>S. apetala</i> -zinc oxide nanoparticles                                  | <i>In vitro</i> assays                                    | ~20-100<br>~400-500 | $\alpha$ -Amylase ↓, free radical ↓, inflammation ↓.                                                                                                                                                                                                                                                | [51]    |
| 91 | <i>Sphaeranthus Amaranthoides</i> whole plant | <i>S. amaranthoides</i> -silver nanoparticles                                                                           | <i>In vitro</i> assay                                     | ~50-150             | $\alpha$ -Amylase ↓.                                                                                                                                                                                                                                                                                | [88]    |
| 92 | <i>Stevia rebaudiana</i> leaf                 | <i>S. rebaudiana</i> -tripolyphosphate-chitosan nanoparticles<br><br><i>S. rebaudiana</i> -titanium oxide nanoparticles | Streptozotocin-diabetic rats<br><br>Alloxan-diabetic rats | ~327<br><br>~4-100  | Blood glucose ↓, serum insulin ↑, serum AST ↓, serum ALT ↓, serum ALP ↓, SOD (liver and kidney) ↑, CAT (liver and kidney) ↑, GSH (liver and kidney) ↑, lipid peroxidation (liver and kidney) ↓.<br>Blood glucose ↓, glycated haemoglobin ↓, serum insulin ↑, serum triglycerides                    | [89,90] |

|    |                                            |                                                     |                                                                                                               |         |                                                                                                                                                                                            |         |
|----|--------------------------------------------|-----------------------------------------------------|---------------------------------------------------------------------------------------------------------------|---------|--------------------------------------------------------------------------------------------------------------------------------------------------------------------------------------------|---------|
|    |                                            |                                                     |                                                                                                               |         | ↓, serum cholesterol ↓, body weight ↑.                                                                                                                                                     |         |
| 93 | <i>Stoechospermum marginatum</i> seaweed   | <i>S. marginatum</i> -silver nanoparticles          | <i>In vitro</i> assays                                                                                        | -       | α-Amylase ↓, cytotoxicity ↓.                                                                                                                                                               | [91]    |
| 94 | <i>Syzygium cumini</i> seed                | <i>S. cumini</i> -silver nanoparticles              | <i>In vitro</i> assays                                                                                        | ~40-100 | Free radicals ↓.                                                                                                                                                                           | [92,93] |
|    |                                            | <i>S. cumini</i> polymeric nanoparticles            | Glucose-stressed H9C2 cardiac cells<br>Streptozotocin-diabetic rats inoculated with <i>Candida albicans</i> . | -       | Nuclear abnormalities ↓, cell size ↓, lipid peroxidation ↓.<br>Adenosine deaminase ↓, 5'-nucleotidase activity ↓, AMP hydrolysis ↓, NTPDase activity ↓, ADP ↓.                             |         |
| 95 | <i>Syzygium jambolanum</i> seed            | <i>S. jambolanum</i> -PLGA nanoparticles            | <i>In vitro</i> assays                                                                                        | ~122    | Cyto-toxicity ↓, glucose uptake (L6 skeletal muscle cells) ↑, ROS ↓, NF-κB ↓, iNOS ↓, GK mRNA ↑, GLUT-4 protein and gene ↑.                                                                | [94]    |
|    |                                            |                                                     | Arsenic-hyperglycemic mice                                                                                    |         | Blood glucose ↓, glycated haemoglobin ↓.                                                                                                                                                   |         |
| 96 | <i>Talinum portulacifolium</i> whole plant | <i>T. portulacifolium</i> solid lipid nanoparticles | High fat diet + streptozotocin-diabetic rats                                                                  | ~260    | Blood glucose ↓, serum triglycerides ↓, serum cholesterol ↓, serum HDL-cholesterol ↑, serum LDL-cholesterol ↓, serum AST ↓, serum ALT ↓, serum CAT ↑, serum GSH ↑, serum lipid peroxide ↓. | [95]    |
| 97 | <i>Tamarindus indica</i> leaf              | <i>T. indica</i> -zinc oxide nanoparticles          | <i>In vitro</i> assays                                                                                        | ~27-54  | α-Glucosidase ↓, α-amylase ↓, free radicals ↓, H <sub>2</sub> O <sub>2</sub> ↓.                                                                                                            | [9]     |
| 98 | <i>Tephrosia tinctoria</i> stem            | <i>T. tinctoria</i> -silver nanoparticles           | <i>In vitro</i> assays                                                                                        | < 100   | α-Glucosidase ↓, α-amylase ↓, glucose uptake (erythrocytes) ↑, free radicals ↓.                                                                                                            | [96]    |
| 99 | <i>Tinospora cordifolia</i> stem           | <i>T. cordifolia</i> -PLA-PVA nanoparticles         | <i>In vitro</i> assays                                                                                        | ~230    | Sustained release ↑, α-glucosidase ↓.                                                                                                                                                      | [97]    |

|                                       |                                                                |                                                                                           |                                                |           |                                                                                                                                                                      |          |
|---------------------------------------|----------------------------------------------------------------|-------------------------------------------------------------------------------------------|------------------------------------------------|-----------|----------------------------------------------------------------------------------------------------------------------------------------------------------------------|----------|
| 100                                   | <i>Trigonella foenum graecum</i> seed                          | <i>T. foenum graecum</i> -PLGA nanoparticles                                              | Alloxan-diabetic male mice                     | -         | Body mass ↑, pancreatic gland mass ↑, lipid peroxidation ↓, lipofuscin granules ↓.                                                                                   | [98,99]  |
|                                       |                                                                | <i>T. foenum graecum</i> -silver-gold nanoparticles                                       | Streptozotocin-diabetic rats                   | ~73       | Blood glucose ↓, serum ALT ↓, serum urea ↓, serum creatinine ↓.                                                                                                      |          |
| 101                                   | <i>Vaccinium arctostaphylos</i> fruit                          | <i>V. arctostaphylos</i> -zinc oxide nanoparticles                                        | Alloxan-diabetic rats                          | ~15       | Blood glucose ↓, serum insulin ↑ (insignificant), serum triglycerides ↓ (insignificant), serum cholesterol ↓, serum HDL-cholesterol ↑.                               | [100]    |
| 102                                   | <i>Withania coagulans</i> plant                                | <i>W. coagulans</i> antidiabetic fraction-chitosan assembled enteric-coated nanoparticles | <i>In vitro</i> assay<br>Alloxan-diabetic mice | -         | Insulin secretion ↑ (MIN6 cells).<br>Blood glucose ↓, bioavailability ↑.                                                                                             | [101]    |
| 103                                   | <i>Withania somnifera</i> leaf                                 | <i>Withania somnifera</i> -platinum nanoparticles                                         | Streptozotocin-diabetic rats                   | ~12       | Plasma glucose ↓.                                                                                                                                                    | [102]    |
| 104                                   | <i>Withania somnifera</i> root                                 | <i>W. somnifera</i> -silver nanoparticles                                                 | <i>In vitro</i> assays                         | ~123      | α-Glucosidase ↓, α-amylase ↓.                                                                                                                                        | [103]    |
| 105                                   | <i>Vaccinium arctostaphylos</i> leaf                           | <i>V. arctostaphylos</i> -zinc oxide nanoparticles                                        | Alloxan-diabetic rats                          | ~12-27    | Blood glucose ↓, serum insulin ↑, serum triglycerides ↓, serum cholesterol ↓, serum HDL-cholesterol ↑.                                                               | [100,65] |
| 106                                   | <i>Xylocarpus granatum</i> bark                                | <i>X. granatum</i> -silver nanoparticles                                                  | <i>In vitro</i> assays                         | ~99       | α-Glucosidase ↓, α-glucosidase ↓, free radicals ↓, inflammation ↓.                                                                                                   | [8]      |
| <b>Natural formulations /mixtures</b> |                                                                |                                                                                           |                                                |           |                                                                                                                                                                      |          |
| 107                                   | Jiaosanxian (charcoal used in TCM)                             | Jiaosanxian-derived carbon dots                                                           | Glucose-hyperglycemic mice                     | ~4.4-6.4  | Solubility ↑, blood glucose ↓.                                                                                                                                       | [104]    |
| 108                                   | Ge-Gen-Qin-Lian-Tang decoction (polyherbal formulation in TCM) | Ge-Gen-Qin-Lian-Tang micro/nano-aggregates                                                | <i>In vitro</i> assays                         | ~300-1000 | Baicalin cellular uptake ↑ (Caco-2 cells), β-cell proliferation ↑ (INS-1 cells), oxidative stress ↓ (streptozotocin-INS-1 cells), insulin secretion ↑ (glucose-INS-1 | [105]    |

|     |                                                                                              |                           |                              |          | cells)                                                                               |           |
|-----|----------------------------------------------------------------------------------------------|---------------------------|------------------------------|----------|--------------------------------------------------------------------------------------|-----------|
| 109 | Jasada bhasma or Yashada bhasma (Ayurvedic bhasma)                                           | Zinc-based nanoparticles  | Streptozotocin-diabetic rats | ~200-500 | Oxidative stress ↓, Blood glucose ↓, glucose tolerance ↑, insulin sensitivity ↑.     | [106]     |
| 110 | Clinoptilolite, natural zeolite (Na, K, Al, and Si containing mineral linked through oxygen) | Nano-sized clinoptilolite | Streptozotocin-diabetic rats | ~30-40   | Blood glucose ↓, weight loss ↓, serum LDL-cholesterol ↓, serum lipid peroxidation ↓. | [107,108] |

ACP: Acid phosphatase, ADP: adenosine diphosphate, ALP: Alkaline phosphatase, ALT: Alanine aminotrasferase, AMP: adenosine monophosphate, AMPK: 5' AMP-activated protein kinase, AST: Aspartate aminotransferase, CAT: catalase, COX: cyclooxygenase, DPP-4: dipeptidyl peptidase-4, F1,6DP: fructose 1,6-bisphosphatase, G6P: glucose 6-phosphatase, G6Pase: glucose-6-phosphatase, G6PD: glucose 6-phosphate dehydrogenase, GGT: gamma glutamyl transpeptidase, GK: glucokinase, GLUT: glucose transporter type, GPx: glutathione peroxidase, GSH: reduced glutathione, HDL: high-density lipoprotein, IFN $\gamma$ : Interferon gamma, IL: interleukin, iNOS: inducible nitric oxide synthase, IR A: Insulin receptor A, LDH: lactate dehydrogenase, LDL: low-density lipoprotein, MMP: matrix metalloproteinase, NF- $\kappa$ B: nuclear factor  $\kappa$ -light-chain-enhancer of activated B cells, NO: nitric oxide, NTPDase: ectonucleoside triphosphate diphosphohydrolase-1, PKLR: pyruvate kinase, PLA: poly-lactide acid, PLGA: poly-(lactide-co-glycolide), PTP1B: protein tyrosine phosphatase 1B, PVA: polyvinyl alcohol, ROS: reactive oxygen species, SOD: superoxide dismutase, TCM: traditional Chinese medicine, TNF- $\alpha$ : tumour necrosis factor alpha, VLDL: very low-density lipoprotein.

## References

1. Jini, D.; Sharmila, S. Green synthesis of silver nanoparticles from *Allium cepa* and its in vitro antidiabetic activity. *Mater. Today Proc.* 2019, <https://doi.org/10.1016/j.matpr.2019.07.672>.
2. Das, G.; Patra, J.K.; Debnath, T.; Ansari, A.; Shin, H.S. Investigation of antioxidant, antibacterial, antidiabetic, and cytotoxicity potential of silver nanoparticles synthesized using the outer peel extract of *Ananas comosus* (L.). *PloS one.* **2019**, *14*, e0220950.
3. Kumar, N. Biocompatible silver nanoparticles synthesized from *Andrographis echinoides* and its antioxidant and antidiabetic effects on STZ induced diabetic rats. *Int. J. Chemtech. Res.* **2018**, *11*, 265-283.
4. Rajakumar, G.; Thiruvengadam, M.; Mydhili, G.; Gomathi, T.; Chung, I.M. Green approach for synthesis of zinc oxide nanoparticles from *Andrographis paniculata* leaf extract and evaluation of their antioxidant, anti-diabetic, and anti-inflammatory activities. *Bioprocess Biosyst. Eng.* **2018**, *41*, 21-30.

5. Arbianti, R.; Dewi, V.; Imansari, F.; Hermansyah, H.; Sahlan, M. Nano-preparation of *Andrographis paniculata* extract by casein micelle for antidiabetic agent. *AIP Conf. Proc.* **2017**, *1817*, 030010.
6. Sudirman, S.; Hsu, Y.H.; Johnson, A.; Tsou, D.; Kong, Z.L. Amelioration effects of nanoencapsulated triterpenoids from petri dish-cultured *Antrodia cinnamomea* on reproductive function of diabetic male rats. *Int. J. Nanomedicine* **2018**, *13*, 5059-5073.
7. Saratale, G.D.; Saratale, R.G.; Benelli, G.; Kumar, G.; Pugazhendhi, A.; Kim, D.S.; Shin, H.S. Anti-diabetic potential of silver nanoparticles synthesized with *Argyrea nervosa* leaf extract high synergistic antibacterial activity with standard antibiotics against foodborne bacteria. *J. Clust. Sci.* **2017**, *28*, 1709-1727.
8. Das, S.K.; Behera, S.; Patra, J.K.; Thatoi, H. Green synthesis of silver nanoparticles using *Avicennia officinalis* and *Xylocarpus granatum* extracts and in vitro evaluation of antioxidant, antidiabetic and anti-inflammatory activities. *J. Clust. Sci.* **2019**, *30*, 1103-1113.
9. Rehana, D.; Mahendiran, D.; Kumar, R.S.; Rahiman, A.K. In vitro antioxidant and antidiabetic activities of zinc oxide nanoparticles synthesized using different plant extracts. *Bioprocess Biosyst. Eng.* **2017**, *40*, 943-957.
10. Bhagwat, T.R.; Joshi, K.A.; Parihar, V.S.; Asok, A.; Bellare, J.; Ghosh, S. Biogenic copper nanoparticles from medicinal plants as novel antidiabetic nanomedicine. *World J. Pharm. Res.* **2018**, *7*, 183-196.
11. Johnson, P.; Krishnan, V.; Loganathan, C.; Govindhan, K.; Raji, V.; Sakayanathan, P.; Vijayan, S.; Sathishkumar, P.; Palvannan, T. Rapid biosynthesis of *Bauhinia variegata* flower extract-mediated silver nanoparticles: an effective antioxidant scavenger and  $\alpha$ -amylase inhibitor. *Artif. Cells Nanomed. Biotechnol.* **2018**, *46*, 1488-1494.
12. Janakiraman, V.; Jenifer, M.; Ramarajan, S. Anti diabetic and anti cancer effects of silver nanoparticles synthesised from *Botryodiplodia theobromae*-an endophytic fungi isolated from *Euphorbia hirta*-a weed. *Int. J. Pharm. Sci. Rev. Res.* **2018**, *53*, 72-76.
13. Nithiya, S.; Sangeetha, R. Amylase inhibitory potential of silver nanoparticles biosynthesized using *Breynia retusa* leaf extract. *World J. Pharm. Res.* **2014**, *3*, 1055-1066.
14. Anandhi, D.; Kanaga, G.; Jagatheesh, S.; Revathi, K. In vitro evaluation of biological activity (anti-inflammatory, antiarthritic, and antidiabetic) of green synthesized silver nanoparticles from ethanolic extract of *Chromolaena odorata*, *Caesalpinia coriaria* (bark and leaves). *Drug Invent. Today.* **2019**, *12*, 1267-1271.
15. Govindappa, M.; Hemashekhar, B.; Arthikala, M.K.; Rai Ravishankar, V.; Ramachandra, Y.L. Characterization, antibacterial, antioxidant, antidiabetic, anti-inflammatory and antityrosinase activity of green synthesized silver nanoparticles using *Calophyllum tomentosum* leaves extract. *Results Phys.* **2018**, *9*, 400-408.
16. Daisy, P.; Saipriya, K. Biochemical analysis of *Cassia fistula* aqueous extract and phytochemically synthesized gold nanoparticles as hypoglycemic treatment for diabetes mellitus. *Int. J. Nanomedicine.* **2012**, *7*, 1189-1202.
17. Prada, A.L.; Keita, H.; de Souza, T.P.; Lima, E.S.; Acho, L.D.R.; da Silva, M.J.A.; Carvalho, J.C.T.; Amado, J.R.R. *Cassia grandis* Lf nanodispersion is a hypoglycemic product with a potent  $\alpha$ -glucosidase and pancreatic lipase inhibitor effect. *Saudi Pharm. J.* **2019**, *27*, 191-199.
18. Liu, Y.; Zeng, S.; Liu, Y.; Wu, W.; Shen, Y.; Zhang, L.; Li, C.; Chen, H.; Liu, A.; Shen, L.; Hu, B.; Wang, C. Synthesis and antidiabetic activity of selenium nanoparticles in the presence of polysaccharides from *Catathelasma ventricosum*. *Int. J. Biol. Macromol.* **2018**, *114*, 632-639.
19. Barkat, M.A.; Mujeeb, M. Comparative study of *Catharanthus roseus* extract and extract loaded chitosan nanoparticles in alloxan induced diabetic rats. *Int. J. Pharm. Biomed.* **2013**, *4*, 670-678.
20. Wilson, S.; Cholan, S.; Vishnu, U.; Sannan, M.; Jananiya, R.; Vinodhini, S.; Manimegalai, S.; Devi Rajeswari, V. In vitro assessment of the efficacy of free-standing silver nanoparticles isolated from *Centella asiatica* against oxidative stress and its antidiabetic activity. *Der. Pharmacia Lettre.* **2015**, *7*, 194-205.
21. Ponnaniakajamideen, M.; Rajeshkumar, S.; Vanaja, M.; Annadurai, G. In vivo type 2 diabetes and wound-healing effects of antioxidant gold nanoparticles synthesized using the insulin plant *Chamaecostus cuspidatus* in albino rats. *Can. J. Diabetes.* **2019**, *43*, 82-89.
22. Elobeid, M.A. Amelioration of streptozotocin induced diabetes in rats by eco-friendly composite nano-cinnamon extract. *Pakistan J. Zool.* **2016**, *48*, 645-650.



23. Kouame, K.; Peter, A.I.; Akang, E.N.; Moodley, R.; Naidu, E.C.; Azu, O.O. Histological and biochemical effects of *Cinnamomum cassia* nanoparticles in kidneys of diabetic Sprague-Dawley rats. *Bosn. J. Basic. Med. Sci.* **2019**, *19*, 138-145.
24. Maddinedi, S.B.; Mandal, B.K.; Maddili, S.K. Biofabrication of size controllable silver nanoparticles - A green approach. *J. Photochem. Photobiol. B.* **2017**, *167*, 236-241.
25. Prasad, A.R.; Basheer, S.M.; Williams, L.; Joseph, A. Highly selective inhibition of  $\alpha$ -glucosidase by green synthesised ZnO nanoparticles - In-vitro screening and in-silico docking studies. *Int. J. Biol. Macromol.* **2019**, *139*, 712-718.
26. Popli, D.; Anil, V.; Subramanyam, A.B.; Namratha, M.N.; Ranjitha, V.R.; Rao, S.N.; Rai, R.V.; Govindappa, M. Endophyte fungi, *Cladosporium* species-mediated synthesis of silver nanoparticles possessing in vitro antioxidant, anti-diabetic and anti-Alzheimer activity. *Artif. Cells Nanomed. Biotechnol.* **2018**, *46*, 676-683.
27. Yakoob, A.T.; Tajuddin, N.B.; Hussain, M.I.M.; Mathew, S.; Govindaraju, A.; Qadri, I. Antioxidant and hypoglycemic activities of *Clausena anisata* (Willd.) Hook F. Ex Benth. root mediated synthesized silver nanoparticles. *Pharmacogn. J.* **2016**, *8*, 579-586.
28. Arsia Tarnam, Y.; Nargis Begum, T.; Muhammad Ilyas, M.H.; Mathew, S.; Govindaraju, A.; Qadri, I. Green synthesis, antioxidant potential and hypoglycemic effect of silver nanoparticles using ethanolic leaf extract of *Clausena anisata* (Willd.) Hook. F. Ex Benth. of Rutaceae. *Pharmacogn. J.* **2016**, *8*, 565-575.
29. Vishnu Kiran, M.; Murugesan, S. Biological synthesis of silver nanoparticles from marine alga *Colpomenia sinuosa* and its in vitro anti-diabetic activity. *The American Journal of Bio-pharmacology Biochemistry and Life Sciences* **2014**, *3*, 1-7.
30. Tahir, H.; Rahman, J.; Ashraf, M.; Anjum, S.; Hussain, I.; Warsi, M.F. Seasonal variation's effect on antidiabetic activity of silver nanoparticles. *Bioinspir. Biomim. Nan.* **2019**, <https://doi.org/10.1680/jbibn.18.00018>.
31. Vinotha, V.; Iswarya, A.; Thaya, R.; Govindarajan, M.; Alharbi, N.S.; Kadaikunnan, S.; Khaled, J.M.; Al-Anbr, M.N.; Vaseeharan, B. Synthesis of ZnO nanoparticles using insulin-rich leaf extract: Anti-diabetic, antibiofilm and anti-oxidant properties. *J. Photochem. Photobiol. B.* **2019**, *197*, 111541.
32. Velumani, S. Green synthesis of gold nanoparticles from *Costus igneus*. *Int. J. Adv. Res. Innov. Ideas. Educ.* **2015**, *1*, 972-978.
33. Aruna, A.; Nandhini, R.; Karthikeyan, V.; Bose, P.; Vijayalakshmi, K. Comparative anti-diabetic effect of methanolic extract of insulin plant (*Costus pictus*) leaves and its silver nanoparticle. *Indo. Am. J. Pharm. Sci.* **2014**, *4*, 3217-3230.
34. Alamoudi, E.F.; Khalil, W.K.B.; Ghaly, I.S.; Hassan, N.H.A.; Ahmed, E.S. Nanoparticles from of *Costus speciosus* extract improves the antidiabetic and antilipidemic effects against STZ-induced diabetes mellitus in albino rats. *Int. J. Pharm. Sci. Rev. Res.* **2014**, *29*, 279-288.
35. Surya, C.; John, N.A.A.; Pandiyan, V.; Ravikumar, S.; Amutha, P.; Sobral, A.J.F.N.; Krishnakumar, B. *Costus speciosus* leaf extract assisted CS-Pt-TiO<sub>2</sub> composites: Synthesis, characterization and their bio and photocatalytic applications. *J. Mol. Struct.* **2019**, *1195*, 787-795.
36. Sengani, M.; Devi Rajeswari, V. Identification of potential antioxidant indices by biogenic gold nanoparticles in hyperglycemic Wistar rats. *Environ. Toxicol. Pharmacol.* **2017**, *50*, 11-19.
37. Kumar, D.G.; Ninganna, D.; Kantharaju, R.M. Antioxidant, antibacterial, antidiabetic potential and genotoxicity of silver nanoparticles using leaf extract of *Curcuma longa*: a novel green approach. *Int. Res. J. Pharm.* **2019**, *10*, 127-136.
38. Agarwal, H.; Kumar, S.V.; Rajeshkumar, S. Antidiabetic effect of silver nanoparticles synthesized using lemongrass (*Cymbopogon citratus*) through conventional heating and microwave irradiation approach. *J. Microbiol. Biotechnol. Food Sci.* **2018**, *7*, 371-376.
39. Ghosh, S.; More, P.; Nitnavare, R.; Jagtap, S.; Chippalkatti, R.; Derle, A.; Kitture, R.; Asok, A.; Kale, S.; Singh, S.; Shaikh, M.L.; Ramanamurthy, B.; Bellare, J.; Chopade, B.A. Antidiabetic and Antioxidant Properties of Copper Nanoparticles Synthesized by Medicinal Plant *Dioscorea bulbifera*. *J. Nanomed. Nanotechnol.* **2015**, *S6*, 007.
40. Al Rashid, H. Preparation and characterization of plga loaded nanoparticles obtained from *D. melanoxylon* Roxb. leaves for their antiproliferative and antidiabetic activity. *International Journal of Green Pharmacy* **2017**, *11*, S438-S447.

41. Kunjiappan, S.; Panneerselvam, T.; Prasad, P.; Sukumaran, S.; Somasundaram, B.; Sankaranarayanan, M.; Murugan, I.; Parasuraman, P. Design, graph theoretical analysis and in silico modeling of *Dunaliella bardawil* biomass encapsulated keratin nanoparticles: a scaffold for effective glucose utilization. *Biomed. Mater.* **2018**, *13*, 045012.
42. Senthikumar, P.; Kumar, D.S.R.S.; Sudhagar, B.; Vanthana, M.; Parveen, M.H.; Sarathkumar, S.; Thomas, J.C.; Mary, A.S.; Kannan, C. Seagrass-mediated silver nanoparticle synthesis by *Enhalus acoroides* and its  $\alpha$ -glucosidase inhibitory activity from the Gulf of Mannar. *J. Nanostructure Chem.* **2016**, *6*, 275-280.
43. Garcia Campoy, A.H.; Perez Gutierrez, R.M.; Manriquez-Alvirde, G.; Muñiz Ramirez, A. Protection of silver nanoparticles using *Eysenhardtia polystachya* in peroxide-induced pancreatic  $\beta$ -cell damage and their antidiabetic properties in zebrafish. *Int. J. Nanomedicine* **2018**, *13*, 2601-2612.
44. Jamdade, D.A.; Rajpali, D.; Joshi, K.A.; Kitture, R.; Kulkarni, A.S.; Shinde, V.S.; Bellare, J.; Babiya, K.R.; Ghosh, S. *Gnidia glauca*- and *Plumbago zeylanica*-mediated synthesis of novel copper nanoparticles as promising antidiabetic agents. *Adv. Pharmacol. Sci.* **2019**, *2019*, 9080279.
45. Venkatachalam, M.; Govindaraju, K.; Mohamed Sadiq, A.; Tamilselvan, S.; Ganesh Kumar, V.; Singaravelu, G. Functionalization of gold nanoparticles as antidiabetic nanomaterial. *Spectrochim Acta A Mol. Biomol. Spectrosc.* **2013**, *116*, 331-338.
46. Karthick, V.; Kumar, V.G.; Dhas, T.S.; Singaravelu, G.; Sadiq, A.M.; Govindaraju, K. Effect of biologically synthesized gold nanoparticles on alloxan-induced diabetic rats-an in vivo approach. *Colloids Surf B Biointerfaces* **2014**, *122*, 505-511.
47. Shanker, K.; Krishna Mohan, G. Anti-diabetic and hypo-lipidemic activity of green synthesized silver nanoparticles and *G. sylvestre* extract on streptozotocin induced diabetic rats: An in vivo approach. *Endocrinol. Metab. Syndr.* **2018**, *7*, 44.
48. Nirmala, S.; Ravichandiran, V.; Vijayalakshmi, A.; Nadanasabapathi, P. Protective effect of *Gymnemic acid* isolated from *Gymnema sylvestre* leaves coated chitosan reduced gold nanoparticles in hyperlipidemia and diabetes induced vascular tissue damage in rats. *Res. J. Pharm. Tech.* **2018**, *11*, 1193-1206.
49. Vishnu Kiran, M.; Murugesan, S. Biogenic silver nanoparticles by *Halymenia poryphyroides* and its in vitro anti-diabetic efficacy. *J. Chem. Pharm. Res.* **2013**, *5*, 1001-1008.
50. Aravinthan, A.; Kamala-Kannan, S.; Govarthanan, M.; Kim, J.H. Accumulation of biosynthesized gold nanoparticles and its impact on various organs of Sprague Dawley rats: a systematic study. *Toxicol Res (Camb)*. **2016**, *5*, 1530-1538.
51. Thatoi, P.; Kerry, R.G.; Gouda, S.; Das, G.; Pramanik, K.; Thatoi, H.; Patra, J.K. Photo-mediated green synthesis of silver and zinc oxide nanoparticles using aqueous extracts of two mangrove plant species, *Heritiera fomes* and *Sonneratia apetala* and investigation of their biomedical applications. *J. Photochem. Photobiol. B.* **2016**, *163*, 311-318.
52. Bala, N.; Saha, S.; Chakraborty, M.; Maiti, M.; Das, S.; Basub, R.; Nandyc, P. Green synthesis of zinc oxide nanoparticles using *Hibiscus subdariffa* leaf extract: effect of temperature on synthesis, anti-bacterial activity and anti-diabetic activity. *RSC Adv.* **2015**, *5*, 4993-5003.
53. Kumar, V.; Singh, S.; Srivastava, B.; Bhadouria, R.; Singh, R. Green synthesis of silver nanoparticles using leaf extract of *Holoptelea integrifolia* and preliminary investigation of its antioxidant, anti-inflammatory, antidiabetic and antibacterial activities. *J. Environ. Chem. Eng.* **2019**, *7*, 103094.
54. Das, G.; Patra, J.K.; Basavegowda, N.; Vishnuprasad, C.N.; Shin, H.S. Comparative study on antidiabetic, cytotoxicity, antioxidant and antibacterial properties of biosynthesized silver nanoparticles using outer peels of two varieties of *Ipomoea batatas* (L.) Lam. *Int. J. Nanomedicine* **2019**, *14*, 4741-4754.
55. Kalakotla, S.; Jayarambabu, N.; Mohan, G.K.; Mydin, R.B.S.M.N.; Gupta, V.R. A novel pharmacological approach of herbal mediated cerium oxide and silver nanoparticles with improved biomedical activity in comparison with *Lawsonia inermis*. *Colloids Surf. B Biointerfaces*. **2019**, *174*, 199-206.
56. Debnath, G.; Das, P.; Saha, A.K. Characterization, antimicrobial and  $\alpha$ -amylase inhibitory activity of silver nanoparticles synthesized by using mushroom extract of *Lentinus tuber-regium*. *Proc Natl Acad Sci India, Sect B Biol Sci.* **2019**, <https://doi.org/10.1007/s40011-019-01076-y>.
57. Balan, K.; Qing, W.; Wang, Y.; Liu, X.; Palvannan, T.; Wang, Y.; Ma, F.; Zhang, Y. Antidiabetic activity of silver nanoparticles from green synthesis using *Lonicera japonica* leaf extract. *RSC Adv.* **2016**, *6*, 40162-40168.

58. Mathur, R.; Vijayvergia, R. Green synthesis of silver nanoparticles by using leaf and stem of *Manilkara zapota* L. and antioxidant and antidiabetic activity. *Int. J. Biol. Med. Res.* **2017**, *8*, 6142-6145.
59. Chowdhury, A.; Kunjiappan, S.; Bhattacharjee, C.; Somasundaram, B.; Panneerselvam, T. Biogenic synthesis of *Marsilea quadrifolia* gold nanoparticles: a study of improved glucose utilization efficiency on 3T3-L1 adipocytes. *In Vitro Cell Dev. Biol. Anim.* **2017**, *53*, 483-493.
60. Shanker, K.; Naradala, J.; Mohan, G.K.; Kumar, G.S.; Pravalika, P.L. A sub-acute oral toxicity analysis and comparative in vivo anti-diabetic activity of zinc oxide, cerium oxide, silver nanoparticles, and *Momordica charantia* in streptozotocin-induced diabetic Wistar rats. *RSC Adv.* **2017**, *7*, 37158-37167.
61. Krishna Mohan, G.; Shanker, K. Biologically synthesized silver nanoparticles from *Momordica charantia* and assessment of antidiabetic activity on Streptozotocin induced diabetic rats. *Medicinal Plants.* **2017**, *6*, 57.
62. Soliman, N.A.; Ismail, E.H.; El-Moaty, H.I.A.; Sabry, D.Y.; Khalil, M.M.H. Anti-*Helicobacter pylori*, anti-diabetic and cytotoxicity activity of biosynthesized gold nanoparticles using *Moriscandia Nitens* water extract. *Egypt J. Chem.* **2018**, *61*(4), 691-703.
63. Rajan, A.R.; Rajan, A.; John, A.; Philip, D. Green synthesis of CeO<sub>2</sub> nanostructures by using *Morus nigra* fruit extract and its antidiabetic activity. *AIP Conference Proceedings.* **2019**, 2105, 020008.
64. Deng, W.; Wang, H.; Wu, B.; Zhang, X. Selenium-layered nanoparticles serving for oral delivery of phytochemicals with hypoglycemic activity to synergistically potentiate the antidiabetic effect. *Acta Pharm. Sin. B.* **2019**, *9*, 74-86.
65. Bayrami, A.; Alioghli, S.; Pouran, S.R.; Habibi-Yangjeh, A.; Khataee, A.; Ramesh, S. A facile ultrasonic-aided biosynthesis of ZnO nanoparticles using *Vaccinium arctostaphylos* L. leaf extract and its antidiabetic, antibacterial, and oxidative activity evaluation. *Ultrasonics Sonochemistry* **2019**, *55*, 57-66.
66. Triastuti, E.; Yurina, V.; Yunita, E.P. Effect of *Nigella Sativa* encapsulated in poly (lactide-co-glycolide) nanoparticles on plasma malondialdehyde and ischemia-modified albumin in a diabetes rat model. *Journal of Pharmaceutical Research & Clinical Practice.* **2016**, *6*, 1-7.
67. Kavitha, K.; Sujatha, K.; Manoharan, S. Development, characterization and antidiabetic potentials of *Nilgiranthus ciliatus* Nees derived nanoparticles. *J. Nanomedicine Biotherapeutic Discov.* **2017**, *7*, 152.
68. Malapermal, V.; Botha, I.; Krishna, S.B.N.; Mbatha, J.N. Enhancing antidiabetic and antimicrobial performance of *Ocimum basilicum*, and *Ocimum sanctum* (L.) using silver nanoparticles. *Saudi J. Biol. Sci.* **2017**, *24*, 1294-1305.
69. Malapermal, V.; Mbatha, J.N.; Gengan, R.M.; Anand, K. Biosynthesis of bimetallic Au-Ag nanoparticles using *Ocimum basilicum* (L.) with antidiabetic and antimicrobial properties. *Adv. Mater. Lett.* **2015**, *6*, 1050-1057.
70. Senthilkumar, P.; Priya, L.; Kumar, R.S.; Bhuvaneshwari, D.S. Potent  $\alpha$ -glucosidase inhibitory activity of green synthesized gold nanoparticles from the brown seaweed *Padina boergeresii*. *International Journal of Recent Advances in Multidisciplinary Research* **2015**, *2*, 917-923.
71. Leela, K.; Anchana Devi, C. study on the applications of silver nanoparticle synthesized using the aqueous extract and the purified secondary metabolites of lichen *Parmelia perlata*. *Int. J. Pharm. Sci. Invent.* **2017**, *6*, 42-59.
72. Al-Twaty, N.H.; Booles, H.F. Nano-encapsulated form of *Phyllanthus emblica* extract increases its therapeutic effects as antidiabetic and antioxidant in rats. *Int. J. Pharm. Sci. Rev. Res.* **2014**, *29*, 11-17.
73. Patra, J.K.; Das, G.; Shin, H.S. Facile green biosynthesis of silver nanoparticles using *Pisum sativum* L. outer peel aqueous extract and its antidiabetic, cytotoxicity, antioxidant, and antibacterial activity. *Int. J. Nanomedicine* **2019**, *14*, 6679-6690.
74. Debnath, G.; Das, P.; Saha, A.K. Green synthesis of silver nanoparticles using mushroom extract of *Pleurotus giganteus*: characterization, antimicrobial, and  $\alpha$ -amylase inhibitory activity. *BioNanoScience* **2019**, *9*, 611-619.

75. Aldawsari, H.M.; Hanafy, A.; Labib, G.S.; Badr, J.M. Antihyperglycemic activities of extracts of the mistletoes *Plicosepalus acaciae* and *P. curviflorus* in comparison to their solid lipid nanoparticle suspension formulations. *Z. Naturforsch C*. **2014**, *69*, 391-398.
76. Prabhu, S.; Vinodhini, S.; Elanchezhian, C.; Rajeswari, D. Evaluation of antidiabetic activity of biologically synthesized silver nanoparticles using *Pouteria sapota* in streptozotocin-induced diabetic rats. *J. Diabetes*. **2018**, *10*, 28-42.
77. Shanker, K.; Mohan, G.K.; Hussain, M.A.; Jayarambabu, N.; Pravallika, P.L. Green biosynthesis, characterization, in vitro antidiabetic activity, and investigational acute toxicity studies of some herbal-mediated silver nanoparticles on animal models. *Pharmacogn. Mag.* **2017**, *13*, 188-192.
78. Bagyalakshmi, J.; Haritha, H. Green synthesis and characterization of silver nanoparticles using *Pterocarpus marsupium* and assessment of its in vitro antidiabetic activity. *Am. J. Adv. Drug. Deliv.* **2017**, *5*, 118-130.
79. Kitture, R.; Chordiya, K.; Gaware, S.; Ghosh, S.; More, P.A.; Kulkarni, P.; Chopade, B.A.; Kale, S.N. ZnO nanoparticles-red sandalwood conjugate: a promising anti-diabetic agent. *J. Nanosci. Nanotechnol.* **2015**, *15*, 4046-4051.
80. Saratale, R.G.; Shin, H.S.; Kumar, G.; Benelli, G.; Kim, D.S.; Saratale, G.D. Exploiting antidiabetic activity of silver nanoparticles synthesized using *Punica granatum* leaves and anticancer potential against human liver cancer cells (HepG2). *Artif. Cells. Nanomed. Biotechnol.* **2018**, *46*, 211-222.
81. Virgen-Ortiz, A.; Limón-Miranda, S.; Soto-Covarrubias, M.A.; Apolinar-Irribé, A.; Rodríguez-León, E.; Iñiguez-Palomares, R. Biocompatible silver nanoparticles synthesized using *Rumex hymenosepalus* extract decreases fasting glucose levels in diabetic rats. *Dig. J. Nanomater. Bios.* **2015**, *10*, 927-933.
82. Opris, R.; Tatomir, C.; Olteanu, D.; Moldovan, R.; Moldovan, B.; David, L.; Nagy, A.; Decea, N.; Kiss, M.L. Filip, G.A. The effect of *Sambucus nigra* L. extract and phytosynthesized gold nanoparticles on diabetic rats. *Colloids Surf B Biointerfaces* **2017**, *150*, 192-200.
83. Patra, N.; Kar, D.; Pal, A.; Behera, A. Antibacterial, anticancer, anti-diabetic and catalytic activity of bio-conjugated metal nanoparticles. *Adv. Nat. Sci.: Nanosci. Nanotechnol.* **2018**, *9*, 035001.
84. Dhas, T.S.; Kumar, V.G.; Karthick, V.; Vasanth, K.; Singaravelu, G.; Govindaraju, K. Effect of biosynthesized gold nanoparticles by *Sargassum swartzii* in alloxan induced diabetic rats. *Enzyme Microb. Technol.* **2016**, *95*, 100-106.
85. Bano, F.; Baber, M.; Ali, A.; Shah, Z.; Muhammad, S.A. Biosynthesis, characterization, and biological activities of iron nanoparticles using *Sesamum indicum* seeds extract. *Pharmacogn. Mag.* **2017**, *13*, S33-S36.
86. Mohammadi Arvanag, F.; Bayrami, A.; Habibi-Yangjeh, A.; Rahim Pouran, S. A comprehensive study on antidiabetic and antibacterial activities of ZnO nanoparticles biosynthesized using *Silybum marianum* L seed extract. *Mater. Sci. Eng. C Mater. Biol. Appl.* **2019**, *97*, 397-405.
87. Sengottaiyan, A.; Aravinthan, A.; Sudhakar, C.; Selvam, K.; Srinivasan, P.; Govarthanan, M.; Manoharan, K.; Selvankumar, T. Synthesis and characterization of *Solanum nigrum*-mediated silver nanoparticles and its protective effect on alloxan-induced diabetic rats. *J. Nanostructure Chem.* **2016**, *6*, 41-48.
88. Swarnalatha, L.; Rachel, C.; Ranjan, S.; Baradwaj, P. Evaluation of in vitro antidiabetic activity of *Sphaeranthus amaranthoides* silver nanoparticles. *International Journal of Nanomaterials and Biostructures* **2012**, *2*, 25-29.
89. Perumal, V.; Manickam, T.; Bang, K.S.; Velmurugan, P.; Oh, B.T. Antidiabetic potential of bioactive molecules coated chitosan nanoparticles in experimental rats. *Int. J. Biol. Macromol.* **2016**, *92*, 63-69.
90. Langle, A.; González-Coronel, M.A.; Carmona-Gutiérrez, G.; Moreno-Rodríguez, J.A.; Venegas, B.; Munoz, G.; Trevino, S.; Díaz, A. *Stevia rebaudiana* loaded titanium oxide nanomaterials as an antidiabetic agent in rats. *Rev. Bras. Farmacogn.* **2015**, *25*, 145-151.
91. Sabatini, P.; Anchana Devi, C. Anti-microbial, ovicidal, larvicidal, anti-diabetic and cytotoxicity activity of silver nanoparticles from brown seaweed (*Stoechospermum marginatum*). *Int. J. Pharm. Sci. Res.* **2018**, *9*, 1555-1564.

92. Atale, N.; Saxena, S.; Nirmala, J.G.; Narendhirakannan, R.T.; Mohanty, S.; Rani, V. Synthesis and characterization of *Syzygium cumini* nanoparticles for its protective potential in high glucose-induced cardiac stress: a green approach. *Appl. Biochem. Biotechnol.* **2017**, *181*, 1140-1154.
93. Bitencourt, P.E.R.; dos Santos Stein, C.; Borges, R.M.; Moretto, M.B. Aqueous seed extract of *Syzygium cumini* (asc) and polymeric nanoparticles (npasc) modulate adenine nucleotide and nucleoside hydrolysis in diabetic rats with candidiasis. *Diabetol. Metab. Syndr.* **2015**, *7*, A2.
94. Samadder, A.; Das, S.; Das, J.; Paul, A.; Khuda-Bukhsh, A.R. Ameliorative effects of *Syzygium jambolanum* extract and its poly (lactic-co-glycolic) acid nano-encapsulated form on arsenic-induced hyperglycemic stress: a multi-parametric evaluation. *Journal of acupuncture and meridian studies* **2012**, *5*, 310-318.
95. Hima Bindu, R.; Mohana Lakshmi, S.; Himaja, N.; Nirosha, K.; Pooja, M. Formulation, characterisation and antidiabetic evaluation of *Talinum portulacifolium* (Forssk.) loaded solid lipid nanoparticles in streptozotocin & high fat diet induced diabetic rats. *Journal of Global Trends in Pharmaceutical Sciences* **2014**, *5*, 2108-2114.
96. Rajaram, K.; Aiswarya, D.C.; Sureshkumar, K. Green synthesis of silver nanoparticle using *Tephrosia tinctoria* and its antidiabetic activity. *Mater. Lett.* **2015**, *138*, 251-254.
97. Ragavee, A.; Devi, S.A. Nanoencapsulation of *Tinospora cordifolia* (Willd.) using poly (D, L-lactide) nanoparticles: yield optimization by response surface methodology and in silico modeling with insulin receptor tyrosine kinase. *Phcog. Mag.* **2019**, *15*, 218-227.
98. Walvekar, M.V.; Pol, S.B.; Deshmukh, V.M. Modulatory effect of fenugreek loaded PLGA nanoparticles on lipofuscinogenesis in pancreas of alloxan induced diabetic mice. *International Journal of Pharmaceutical and Clinical Research* **2016**, *8*, 22-25.
99. Virk, P. Antidiabetic activity of green gold-silver nanocomposite with *Trigonella foenum graecum* L. seeds extract on streptozotocin induced diabetic rats. *Pakistan J. Zool.* **2018**, *50*, 711-718.
100. Bayrami, A.; Parvinroo, S.; Habibi-Yangjeh, A.; Rahim Pouran, S. Bio-extract-mediated ZnO nanoparticles: microwave-assisted synthesis, characterization and antidiabetic activity evaluation. *Artif. Cells Nanomed. Biotechnol.* **2018**, *46*, 730-739.
101. Sampathkumar, K.; Riyajan, S.; Tan, C.K.; Demokritou, P.; Chudapongse, N.; Loo, S.C.J. Small-intestine-specific delivery of antidiabetic extracts from *withania coagulans* using polysaccharide-based enteric-coated nanoparticles. *ACS Omega* **2019**, *4*, 12049-12057.
102. Li, Y.; Zhang, J.; Gu, J.; Chen, S.; Wang, C.; Jia, W. Biosynthesis of polyphenol-stabilised nanoparticles and assessment of anti-diabetic activity. *J. Photochem. Photobiol. B.* **2017**, *169*, 96-100.
103. Uddin, M.I.; Kavya, G.; Soundarya, G.; Ropa, G.; Sridhar, C.H. Anti-diabetic activity of silver nanoparticles synthesized from ashwagandha root aqueous extract. *Asian Journal of Pharmaceutical Education and Research* **2018**, *7*, 45-59.
104. Sun, Z.; Lu, F.; Cheng, J.; Zhang, M.; Zhu, Y.; Zhang, Y.; Kong, H.; Qu, H.; Zhao, Y. Hypoglycemic bioactivity of novel eco-friendly carbon dots derived from traditional Chinese medicine. *J. Biomed. Nanotechnol.* **2018**, *14*, 2146-2155.
105. Lin, D.; Du, Q.; Wang, H.; Gao, G.; Zhou, J.; Ke, L.; Chen, T.; Shaw, C.; Rao, P. Antidiabetic micro-/nanoaggregates from Ge-Gen-Qin-Lian-Tang decoction increase absorption of baicalin and cellular antioxidant activity in vitro. *Biomed. Res. Int.* **2017**, *2017*, 9217912.
106. Umrani, R.D.; Paknikar, K.M. Jasada bhasma, a zinc-based Ayurvedic preparation: contemporary evidence of antidiabetic activity inspires development of a nanomedicine. *Evid. Based Complement. Alternat. Med.* **2015**, *2015*, 193156.
107. Hossein-Nia, B.; Khorram, S.; Rezazadeh, H.; Safaiyan, A.; Ghiasi, R.; Tarighat-Esfanjani, A. The effects of natural clinoptilolite and nano-sized clinoptilolite supplementation on lipid profile, food intakes and body weight in rats with streptozotocin-induced diabetes. *Adv. Pharm. Bull.* **2018**, *8*, 211-216.
108. Hossein-Nia, B.; Khorram, S.; Rezazadeh, H.; Safaiyan, A.; Tarighat-Esfanjani, A. The effects of natural clinoptilolite and nano-sized clinoptilolite supplementation on glucose levels and oxidative stress in rats with type 1 diabetes. *Can. J. Diabetes.* **2018**, *42*, 31-35.
